# Supplementary material for: Towards a Natural Classification of Hyphodontia Sensu Lato and the Trait Evolution of Basidiocarps within Hymenochaetales (Basidiomycota)
Source: MDPI journal article supplement (doi:10.3390/jof7060478), 2021-06-12
Supplement: s1 [file s1]

Table S2 Information of taxa used in molecular clock analysis besides those indicated in Table S1

| Phylum/class/order/family                                  | Species                             | Voucher       | ITS      | LSU      | <i>tefla</i> | <i>rpb1</i> | <i>rpb2</i> |
|------------------------------------------------------------|-------------------------------------|---------------|----------|----------|--------------|-------------|-------------|
| <i>Ascomycota/Sordariomycetes/Sordariales/Sordariaceae</i> | <i>Neurospora crassa</i>            | OR74A         | HQ271348 | AF286411 | XM959775     |             | AF107789    |
| <i>Basidiomycota/Agaricomycetes/Agaricales/Agaricaceae</i> | <i>Lepiota cristata</i>             | ZRL20151133   | LT716026 | KY418841 | KY419048     | KY418963    | KY418992    |
| <i>-/-/Strophariaceae</i>                                  | <i>Gymnopilus picreus</i>           | ZRL2015011    | LT716066 | KY418882 | KY419077     | KY418980    | KY419027    |
| <i>-/-/Amylocorticiales/Amylocorticiaceae</i>              | <i>Anomoloma myceliosum</i>         | MJL 4413      | GU187500 | GU187559 | GU187677     | GU187441    | GU187766    |
|                                                            | <i>Amylocorticium cebennense</i>    | HHB 2808      | GU187505 | GU187561 | GU187675     | GU187439    | GU187770    |
| <i>-/-/Atheliales/Atheliaceae</i>                          | <i>Athelia arachnoidea</i>          | CBS 418.72    | GU187504 | GU187557 | GU187672     | GU187436    | GU187769    |
|                                                            | <i>Leptosporomyces raunkiaeri</i>   | HHB 7628      | GU187528 | GU187588 | GU187719     | GU187471    | GU187791    |
| <i>-/-/Auriculariales/Auriculariaceae</i>                  | <i>Auricularia heimuer</i>          | Xiaoheimao    | LT716074 | KY418890 | KY419083     | KY418982    | KY419035    |
| <i>-/-/Boletales/Gomphidiaceae</i>                         | <i>Gomphidius roseus</i>            | MB 95-038     | DQ534570 | DQ534669 | GU187702     | GU187459    | GU187818    |
| <i>-/-/Suillaceae</i>                                      | <i>Suillus pictus</i>               | AFTOL 717     | AY854069 | AY684154 | AY883429     | AY858965    | AY786066    |
| <i>-/-/Cantharellales/Clavulinaceae</i>                    | <i>Multiclavula mucida</i>          | AFTOL 1130    | DQ521417 | AY885163 |              |             |             |
| <i>-/-/Hydnaceae</i>                                       | <i>Hydnum repandum</i>              | BB 07.341     |          | KF294643 | JX192980     |             | KF294720    |
| <i>-/-/Corticiales/Corticiaceae</i>                        | <i>Corticium roseum</i>             | MG43          | GU590877 | AY463401 |              |             |             |
| <i>-/-/Vuilleminiaceae</i>                                 | <i>Australovuilleminia coccinea</i> | MG75          | HM046875 | HM046931 |              |             |             |
| <i>-/-/Geastrales/Geastraceae</i>                          | <i>Pyrenogaster pityophilus</i>     | OSC 59743     |          | DQ218519 | DQ219232     |             | DQ219057    |
|                                                            | <i>Geastrum recolligens</i>         | OSC 41996     |          | DQ218486 | DQ219230     |             | DQ219052    |
| <i>-/-/Gloeophyllales/Gloeophyllaceae</i>                  | <i>Gloeophyllum sepiarium</i>       | Wilcox-3BB    | HM536091 | HM536061 | HM536110     |             | HM536109    |
|                                                            | <i>Gloeophyllum striatum</i>        | ARIZAN 027866 | HM536092 | HM536063 | HM536111     |             | HM640259    |
| <i>-/-/Gomphales/Gomphaceae</i>                            | <i>Ramaria rubella</i>              | AFTOL 724     | AY854078 | AY645057 | AY883435     |             | AY786064    |
|                                                            | <i>Gautieria otthii</i>             | AFTOL 466     | AY883434 | AF393058 | AY883434     |             | AY218486    |
| <i>-/-/Hymenochaetales/Hymenochaetaceae</i>                | <i>Fomitiporia mediterranea</i>     | AFTOL 688     | AY854080 | AY684157 | AY885149     | AY864870    | AY803748    |

|                                                    |                                  |             |          |          |          |          |
|----------------------------------------------------|----------------------------------|-------------|----------|----------|----------|----------|
|                                                    | <i>F. hartigii</i>               | MUCL 53551  | JX093789 | JX093833 | JX093746 | JX093877 |
|                                                    | <i>Porodaedalea chinensis</i>    | Cui 10252   | KX673606 | MH152358 | MG585301 | MH101479 |
| -/-/Oxyporaceae                                    | <i>Rigidoporus corticola</i>     | ZRL20151459 | LT716075 | KY418899 | KY419087 | KY419038 |
| -/-/Hysterangiales/Hysterangiaceae                 | <i>Aroramyces gelatinosporus</i> | H4010       |          | DQ218524 | DQ219118 | DQ218941 |
| -/-/Mesophelliaceae                                | <i>Chondrogaster pachysporus</i> | OSC 49298   |          | DQ218538 | DQ219136 | DQ218958 |
| -/-/Jaapiales/Jaapiaceae                           | <i>Jaapia argillacea</i>         | CBS 252.74  | GU187524 | GU187581 | GU187711 | GU187463 |
| -/-/Phallales/Phallaceae                           | <i>Dictyophora duplicata</i>     | OSC 38819   |          | DQ218481 | DQ219265 | DQ219087 |
|                                                    | <i>Phallus costatus</i>          | MB 02040    |          | DQ218513 | DQ219279 | DQ219104 |
| -/-/Polyporales/Meripilaceae                       | <i>Grifola frondosa</i>          | AFTOL 701   | AY854084 | AY629318 | AY885153 | AY864876 |
| -/-/Polyporaceae                                   | <i>Trametes versicolor</i>       | ZRL20151477 | LT716079 | KY418903 | KY419091 | KY418984 |
| -/-/Russulales/Bondarzewiaceae                     | <i>Bondarzewia montana</i>       | AFTOL 452   | DQ200923 | DQ234539 | DQ059044 | DQ256049 |
| -/-/Sebacinales/Sebacinaceae                       | <i>Craterocolla cerasi</i>       | TUB 020203  | KF061265 | KF061265 |          | KF061300 |
|                                                    | <i>Tremellodendron</i> sp.       | PBM 2324    | DQ411526 |          | DQ029196 | DQ408132 |
| -/-/Stereopsidales/Stereopsidaceae                 | <i>Stereopsis</i> sp.            | OKHL 15544  |          |          | KC203519 | KC203505 |
|                                                    | <i>Stereopsis radicans</i>       | OLR 45395   |          | KC203496 | KC203516 | KC203502 |
| -/-/Thelephorales/Bankeraceae                      | <i>Boletopsis leucomelaena</i>   | AFTOL 1527  | DQ484064 | DQ154112 | GU187763 | GU187494 |
| -/-/Thelephoraceae                                 | <i>Thelephora ganbajun</i>       | ZRL20151295 | LT716082 | KY418908 | KY419093 | KY418987 |
| -/-/Trechisporales/Hydodontaceae                   | <i>Brevicellicium olivascens</i> | KHL 8571    | HE963792 | HE963793 |          |          |
|                                                    | <i>Trechispora alnicola</i>      | AFTOL 665   | DQ411529 | AY635768 | DQ059052 |          |
| -/-/Dacrymycetes/Dacrymycetales/Dacrymycetaceae    | <i>Calocera cornea</i>           | AFTOL 438   | AY789083 | AY701526 | AY881019 | AY536286 |
|                                                    | <i>Dacryopinax spathularia</i>   | AFTOL 454   | AY854070 | AY701525 | AY881020 | AY786054 |
| -/-/Tremellomycetes/Tremellales/Tremellaceae/      | <i>Cryptococcus humicola</i>     | AFTOL 1552  | DQ645516 | DQ645514 | DQ645519 | DQ645517 |
| -/-/Ustilaginomycetes/Ustilaginales/Ustilaginaceae | <i>Ustilago maydis</i>           | AFTOL 505   | AY854090 | AF453938 | AY885160 | AY485636 |
