# Supplementary material for: Towards a Natural Classification of Hyphodontia Sensu Lato and the Trait Evolution of Basidiocarps within Hymenochaetales (Basidiomycota)
Source: MDPI journal article supplement (doi:10.3390/jof7060478), 2021-06-12
Supplement: s1 [file s1]

Table S1 Information of taxa used in phylogenetic analyses

| Order/family                          | Species                   | Voucher                                 | ITS             | LSU             | mt-SSU          | <i>teflα</i> | <i>rpb1</i> | <i>rpb2</i> | <i>atp6</i> |
|---------------------------------------|---------------------------|-----------------------------------------|-----------------|-----------------|-----------------|--------------|-------------|-------------|-------------|
| <i>Auriculariales/Auriculariaceae</i> | <i>Auricularia cornea</i> | LWZ 20190421-1<br>(HMAS)*               | <b>MT319406</b> | <b>MT319135</b> | <b>MT326526</b> |              |             |             |             |
| <i>Hymenochaetales/Claetophorales</i> | <i>Kneiffiella abdita</i> | Dai 15045                               | <b>MW209700</b> |                 | <b>MW221940</b> |              |             |             |             |
|                                       | <i>K. abieticola</i>      | GEL 2924                                | DQ340331        |                 |                 |              |             |             |             |
|                                       |                           | KHL 12498 <sup>#</sup>                  | DQ873601        | DQ873601        |                 |              |             |             |             |
|                                       |                           | UC2022838                               | KP814342        |                 |                 |              |             |             |             |
|                                       | <i>K. alienata</i>        | CBS 127219                              | MH864327        | MH875772        |                 |              |             |             |             |
|                                       |                           | EL 14-98                                | AY466401        | AY586727        |                 |              |             |             |             |
|                                       | <i>K. alutacea</i>        | GEL 2284                                | DQ340340        |                 |                 |              |             |             |             |
|                                       |                           | GEL 2937                                | DQ340338        |                 |                 |              |             |             |             |
|                                       | <i>K. barba-jovis</i>     | KHL 11730 <sup>#</sup>                  | DQ873609        | DQ873610        |                 |              |             |             |             |
|                                       | <i>K. cineracea</i>       | GEL 4875                                | DQ340335        |                 |                 |              |             |             |             |
|                                       |                           | GEL 4958                                | DQ340336        |                 |                 |              |             |             |             |
|                                       | <i>K. decorticans</i>     | SP 415980                               | KY081795        |                 |                 |              |             |             |             |
|                                       | <i>K. efibulata</i>       | GB-0151167                              | KY081796        |                 |                 |              |             |             |             |
|                                       | <i>K. eucalypticola</i>   | LWZ 20180509-11<br>(HMAS) <sup>**</sup> | <b>MT319410</b> | <b>MT319142</b> | <b>MT326421</b> |              |             |             |             |
|                                       |                           | LWZ 20180512-7<br>(HMAS)                | <b>MT319409</b> | <b>MT319141</b> | <b>MT326420</b> |              |             |             |             |
|                                       |                           | LWZ 20180515-9<br>(HMAS)                | <b>MT319411</b> | <b>MT319143</b> |                 |              |             |             |             |
|                                       | <i>K. floccosa</i>        | Berglund 150-02                         | DQ873618        | DQ873618        |                 |              |             |             |             |
|                                       |                           | UC2022896                               | KP814440        |                 |                 |              |             |             |             |

|                |                           |                        |                 |                 |                 |          |          |
|----------------|---------------------------|------------------------|-----------------|-----------------|-----------------|----------|----------|
|                |                           | UC2022902              | KP814441        |                 |                 |          |          |
|                |                           | UC2022919              | KP814153        |                 |                 |          |          |
|                | <i>K. microspora</i>      | Hjortstam 18578        | KY081792        |                 |                 |          |          |
|                | = <i>K. palmae</i>        | FR7                    | KP689185        |                 |                 |          |          |
|                |                           | GEL 3456               | DQ340333        |                 |                 |          |          |
|                | <i>K. pilaecystidiata</i> | Cui 13239              | KY290984        |                 |                 |          |          |
|                |                           | Cui 13240              | KY290985        |                 |                 |          |          |
|                |                           | MSK-F 4723             | MK575208        | MK598739        |                 |          |          |
|                | <i>K. stereicola</i>      | Blackwell 2141         | KY081797        |                 |                 |          |          |
|                | <i>K. subalutacea</i>     | GEL 2142               | DQ340334        |                 |                 |          |          |
|                |                           | GEL 2196               | DQ340341        |                 |                 |          |          |
|                |                           | KUC 20130726-11        | KJ668514        |                 |                 |          |          |
|                |                           | LWZ 20170816-9         | <b>MT319407</b> | <b>MT319139</b> |                 |          |          |
|                |                           | (IFP) <sup>#</sup>     |                 |                 |                 |          |          |
|                |                           | UC2023092              | KP814444        |                 |                 |          |          |
|                | <i>K. subefibulata</i>    | Dai 10526              | KT989970        |                 |                 |          |          |
|                |                           | Dai 10803              | KT989971        |                 |                 |          |          |
|                | <i>K. subglobosa</i>      | LWZ 20180416-6         | <b>MT319413</b> | <b>MT319145</b> | <b>MT326422</b> |          |          |
|                |                           | (HMAS)*                |                 |                 |                 |          |          |
|                |                           | Wu 890805-2            | KY081798        |                 |                 |          |          |
|                | <i>Kneiffiella</i> sp.    | LWZ 20171015-2         | <b>MT319412</b> | <b>MT319144</b> | <b>MT326527</b> |          |          |
|                |                           | (IFP) <sup>#*</sup>    |                 |                 |                 |          |          |
|                | <i>Kneiffiella</i> sp.    | LWZ 20180510-31        | <b>MT319408</b> | <b>MT319140</b> | <b>MT326419</b> |          |          |
|                |                           | (HMAS)*                |                 |                 |                 |          |          |
| /Coltriciaceae | <i>Coltricia perennis</i> | Cui 10319 <sup>#</sup> | KU360687        | KU360653        | KY693935        | KX364848 | KX364894 |
|                | <i>Coltriciella</i>       | Dai 10944 <sup>#</sup> | KY693737        | KY693757        |                 |          | KY693908 |

|                          |                             |                   |                 |                 |                 |
|--------------------------|-----------------------------|-------------------|-----------------|-----------------|-----------------|
|                          | <i>dependens</i>            |                   |                 |                 |                 |
| <i>/Hymenochaetaceae</i> | <i>Fomitiporia hartigii</i> | Cui 9914 (BJFC)*  | KY750527        | <b>MT319381</b> | <b>MT326559</b> |
|                          | <i>Fulvoderma</i>           | LWZ 20170816-31   | <b>MT332135</b> | <b>MT319395</b> | <b>MT326509</b> |
|                          | <i>scaurum</i>              | (IFP)*            |                 |                 |                 |
|                          | <i>Fuscoporia viticola</i>  | LWZ 20130510-3    | <b>MT332136</b> | <b>MT319382</b> |                 |
|                          |                             | (IFP)             |                 |                 |                 |
|                          | <i>Hymenochaete</i>         | He 1049#*         | JQ716407        | JQ279667        | KU978871        |
|                          | <i>rubiginosa</i>           |                   |                 |                 |                 |
|                          | <i>Inonotus hispidus</i>    | LWZ 20180703-1    | <b>MT332137</b> | <b>MT319383</b> | <b>MT326506</b> |
|                          |                             | (HMAS)*           |                 |                 |                 |
|                          | <i>Mensularia radiata</i>   | Yuan 6589 (IFP)*  | <b>MT332140</b> | <b>MT319386</b> | <b>MT326560</b> |
|                          | <i>Onnia tomentosa</i>      | Cui 10048 (BJFC)* | <b>MT332141</b> | <b>MT319387</b> | <b>MT326561</b> |
|                          | <i>Phellinidium</i>         | Cui 10042 (BJFC)* | KR350573        | <b>MT319388</b> | <b>MT326562</b> |
|                          | <i>ferrugineofuscum</i>     |                   |                 |                 |                 |
|                          | <i>Phellinus piceicola</i>  | Cui 10440 (BJFC)* | JQ828908        | <b>MT319389</b> | <b>MT326563</b> |
|                          | <i>Porodaedalea pini</i>    | Dai 7624 (IFP)*   | <b>MT332142</b> | <b>MT319391</b> | <b>MT326565</b> |
|                          | <i>Tropicoporus</i>         | LWZ 20140729-10   | KT223640        | <b>MT319393</b> |                 |
| <i>/Hyphodontiaceae</i>  | <i>boehmeriae</i>           | (IFP)             |                 |                 |                 |
|                          | <i>Hyphodontia</i>          | KHL 11889         | DQ873603        | DQ873603        |                 |
|                          | <i>alutaria</i>             |                   |                 |                 |                 |
|                          |                             | KHL 11978         | EU118631        |                 |                 |
|                          |                             | UC2023078         | KP814431        |                 |                 |
|                          | <i>H. arguta</i>            | FR-0219450        | KR349242        |                 |                 |
|                          |                             | FR-0219451        | KR349243        |                 |                 |
|                          | <i>H. borbonica</i>         | FR-0219441        | KR349240        |                 |                 |
|                          |                             | FR-0219444        | KR349241        |                 |                 |

|                        |                                        |                 |                 |                 |                 |                 |                 |
|------------------------|----------------------------------------|-----------------|-----------------|-----------------|-----------------|-----------------|-----------------|
| <i>H. densispora</i>   | LWZ 20170908-5<br>(IFP) <sup>#*</sup>  | <b>MT319426</b> | <b>MT319160</b> | <b>MT326431</b> |                 | <b>MT326350</b> | <b>MT326261</b> |
|                        | LWZ 20180905-6<br>(HMAS)               | <b>MT319425</b> | <b>MT319159</b> | <b>MT326430</b> |                 |                 |                 |
| <i>‘H. arguta’</i>     | Hjm 18726                              | DQ873605        | DQ873605        |                 |                 |                 |                 |
| <i>H. pallidula</i>    | GEL 2097                               | DQ340317        |                 |                 |                 |                 |                 |
| <i>H. subdetritica</i> | FR-0261085                             | KY081793        |                 |                 |                 |                 |                 |
|                        | FR-0261087                             | KY081794        |                 |                 |                 |                 |                 |
| <i>H. wongiae</i>      | LWZ 20180414-16<br>(HMAS)              | <b>MT319414</b> | <b>MT319146</b> |                 |                 |                 |                 |
|                        | LWZ 20180417-8<br>(HMAS)               | <b>MT319415</b> |                 |                 |                 |                 |                 |
|                        | LWZ 20180417-16<br>(HMAS)              | <b>MT319416</b> | <b>MT319147</b> |                 |                 |                 |                 |
| <i>H. zhixiangii</i>   | LWZ 20160909-4<br>(IFP)                | KY440396        | <b>MT319154</b> | <b>MT326426</b> |                 |                 |                 |
|                        | LWZ 20160909-8<br>(IFP)                | KY440397        | <b>MT319155</b> | <b>MT326427</b> |                 |                 |                 |
|                        | LWZ 20160909-9<br>(IFP)                | KY440398        | <b>MT319156</b> | <b>MT326428</b> |                 |                 |                 |
|                        | LWZ 20170818-13<br>(IFP) <sup>#*</sup> | <b>MT319420</b> | <b>MT319151</b> | <b>MT326424</b> | <b>MT326397</b> | <b>MT326361</b> | <b>MT326270</b> |
|                        | LWZ 20170820-27<br>(IFP)               | <b>MT319421</b> | <b>MT319152</b> | <b>MT326425</b> | <b>MT326408</b> |                 |                 |
|                        | LWZ 20170820-31<br>(IFP)               | <b>MT319422</b> | <b>MT319153</b> |                 |                 |                 |                 |

|                             |                                          |                                        |                 |                 |                 |                 |                 |
|-----------------------------|------------------------------------------|----------------------------------------|-----------------|-----------------|-----------------|-----------------|-----------------|
|                             |                                          | LWZ 20180903-5<br>(HMAS)               | <b>MT319423</b> | <b>MT319158</b> | <b>MT326429</b> | <b>MT326398</b> | <b>MT326294</b> |
|                             |                                          | LWZ 20180903-9<br>(HMAS)               | <b>MT319424</b> | <b>MT319157</b> |                 |                 |                 |
|                             |                                          | LWZ 20180904-12<br>(HMAS)              | <b>MT319419</b> | <b>MT319150</b> |                 |                 |                 |
|                             | <i>Hyphodontia</i> sp.                   | LWZ 20170814-15<br>(IFP) <sup>#*</sup> | <b>MT319417</b> | <b>MT319148</b> | <b>MT326423</b> |                 | <b>MT326269</b> |
|                             | <i>Hyphodontia</i> sp.                   | LWZ 20180511-2<br>(HMAS)               | <b>MT319418</b> | <b>MT319149</b> |                 |                 |                 |
| <i>/Neoantrodiaellaceae</i> | <i>Neoantrodiaella</i><br><i>gypsea</i>  | Cui 10372 <sup>**</sup>                | KT203290        | <b>MT319396</b> | <b>MT326567</b> |                 |                 |
|                             | <i>N. thujae</i>                         | Dai 5065 <sup>#</sup>                  | KT203293        | <b>MT319397</b> | <b>MT326568</b> |                 |                 |
| <i>/Nigrofomitaceae</i>     | <i>Nigrofomes</i><br><i>melanoporus</i>  | JV 1704/39 <sup>#</sup>                | MF629835        | MF629831        |                 |                 |                 |
|                             | <i>N. sinomelanoporus</i>                | Cui 5277 <sup>#</sup>                  | MF629836        | <b>MT319398</b> |                 |                 |                 |
| <i>/Oxyporaceae</i>         | <i>Bridgeoporus</i><br><i>sinensis</i>   | Cui 10013 <sup>#</sup>                 | KY131832        | KY131891        |                 |                 |                 |
|                             | <i>Leucophellinus</i><br><i>hobsonii</i> | Cui 6468 <sup>**</sup>                 | KT203288        | KT203309        | KT203330        |                 |                 |
|                             | <i>L. irpicoides</i>                     | Yuan 2690 <sup>*</sup>                 | KT203289        | KT203310        | KT203331        |                 |                 |
|                             | <i>Rigidoporus</i><br><i>corticola</i>   | Dai 12632 <sup>*</sup>                 | KF111018        | KF111020        | KT203334        |                 |                 |
|                             | <i>R. cuneatus</i>                       | Dai 7339 <sup>*</sup>                  | KT203294        | KT203315        | KT203335        |                 |                 |
|                             | <i>R. ginkgonis</i>                      | Cui 5555 <sup>**</sup>                 | KT203295        | KT203316        | KT203336        |                 |                 |
|                             | <i>R. macroporus</i>                     | Dai 4044                               | KT203298        | KT203319        |                 |                 |                 |

|                        |                         |                 |          |          |          |
|------------------------|-------------------------|-----------------|----------|----------|----------|
| <i>/Schizoporaceae</i> | <i>R. obducens</i>      | Dai 6451        | KY131884 | KY131941 |          |
|                        | <i>R. philadelphi</i>   | Wei 1622*       | KT203300 | KT203321 | KT203340 |
|                        | <i>R. piceicola</i>     | Dai 5033*       | KT203301 | KT203322 | KT203341 |
|                        | <i>R. populinus</i>     | Dai 8908*       | KY131887 | KY131944 | KT203342 |
|                        | <i>R. subpopulinus</i>  | Cui 2236*       | KT203305 | KT203326 | KT203346 |
|                        | <i>Fasciodontia</i>     | MSK-F 7245a     | MK575201 | MK598734 |          |
|                        | <i>brasiliensis</i>     |                 |          |          |          |
|                        | <i>F. bugellensis</i>   | MSK-F 5548      | MK575204 | MK598736 |          |
|                        | <i>Fasciodontia</i> sp. | KUC 20121109-15 | KJ668516 | KJ668368 |          |
|                        | <i>Lyomyces</i>         | FR-0249548      | KY800397 |          |          |
|                        | <i>allantosporus</i>    |                 |          |          |          |
|                        |                         | GEL 4933        | KY800401 |          |          |
|                        | <i>L. bambusinus</i>    | CLZhao 3675     | MN945969 |          |          |
|                        |                         | CLZhao 4808     | MN945970 |          |          |
|                        |                         | CLZhao 4831     | MN945968 |          |          |
|                        |                         | CLZhao 4840     | MN945971 |          |          |
|                        | <i>L. cremeus</i>       | CLZhao 2812     | MN945973 |          |          |
|                        |                         | CLZhao 4138     | MN945974 |          |          |
|                        |                         | CLZhao 8295     | MN945972 |          |          |
|                        | <i>L. crustosus</i>     | CFMR 4572       | KX065944 |          |          |
|                        |                         | CLZhao 875      | MH114730 |          |          |
|                        |                         | CLZhao 1157     | MG231629 |          |          |
|                        |                         | GEL 2325        | DQ340313 |          |          |
|                        |                         | GEL 5336        | DQ340314 |          |          |
|                        |                         | GEL 5360        | DQ340315 |          |          |
|                        |                         | HHB 13100       | MH260069 |          |          |

|                           |                 |                 |                 |                 |                 |                 |                 |
|---------------------------|-----------------|-----------------|-----------------|-----------------|-----------------|-----------------|-----------------|
| KHL 11731                 | DQ873614        | DQ873614        |                 |                 |                 |                 |                 |
| KUC 20121109-18           | KJ668519        |                 |                 |                 |                 |                 |                 |
| LWZ 20170814-22<br>(IFP)* | <b>MT319464</b> | <b>MT319200</b> | <b>MT326445</b> |                 | <b>MT326360</b> | <b>MT326293</b> | <b>MT326570</b> |
| LWZ 20170815-23<br>(IFP)  | <b>MT319465</b> | <b>MT319201</b> | <b>MT326446</b> | <b>MT326400</b> | <b>MT326313</b> | <b>MT326275</b> | <b>MT326571</b> |
| LWZ 20170815-32<br>(IFP)  | <b>MT319466</b> | <b>MT319202</b> | <b>MT326447</b> | <b>MT326402</b> | <b>MT326314</b> | <b>MT326276</b> | <b>MT326572</b> |
| LWZ 20170815-46<br>(IFP)  | <b>MT319467</b> |                 |                 | <b>MT326401</b> | <b>MT326355</b> |                 | <b>MT326574</b> |
| LWZ 20170815-53<br>(IFP)  | <b>MT319670</b> | <b>MT319209</b> |                 |                 |                 |                 |                 |
| LWZ 20170816-1<br>(IFP)   | <b>MT319671</b> | <b>MT319208</b> |                 |                 |                 |                 |                 |
| LWZ 20170816-3<br>(IFP)   | <b>MT319472</b> | <b>MT319207</b> | <b>MT326451</b> | <b>MT326410</b> | <b>MT326315</b> |                 | <b>MT326575</b> |
| LWZ 20170816-20<br>(IFP)  | <b>MT319463</b> | <b>MT319199</b> | <b>MT326524</b> |                 |                 |                 | <b>MT326573</b> |
| LWZ 20180830-7<br>(HMAS)  | <b>MT319468</b> | <b>MT319203</b> |                 |                 |                 |                 |                 |
| LWZ 20180904-2<br>(HMAS)  | <b>MT319469</b> | <b>MT319205</b> | <b>MT326449</b> |                 |                 |                 |                 |
| LWZ 20180904-11<br>(HMAS) | <b>MT319470</b> | <b>MT319206</b> | <b>MT326450</b> | <b>MT326393</b> | <b>MT326316</b> |                 |                 |
| LWZ 20180904-31<br>(HMAS) | <b>MT319471</b> | <b>MT319204</b> | <b>MT326448</b> |                 | <b>MT326317</b> |                 |                 |

|                       |                            |                 |                 |                 |
|-----------------------|----------------------------|-----------------|-----------------|-----------------|
|                       | UC2022841                  | KP814310        |                 |                 |
|                       | Wu 0711-90                 | KC460312        |                 |                 |
|                       | Wu 1007-31                 | KC460313        |                 |                 |
|                       | YG-G39                     | MF382993        |                 |                 |
| <i>'L. juniperi'</i>  | Wu 0308-26                 | KC460311        |                 |                 |
| <i>L. elaeidicola</i> | LWZ 20180411-2<br>(HMAS)   | <b>MT319454</b> | <b>MT319193</b> |                 |
|                       | LWZ 20180411-17<br>(HMAS)  | <b>MT319455</b> | <b>MT319191</b> |                 |
|                       | LWZ 20180411-18<br>(HMAS)  | <b>MT319456</b> | <b>MT319189</b> |                 |
|                       | LWZ 20180411-19<br>(HMAS)  | <b>MT319457</b> | <b>MT319190</b> |                 |
|                       | LWZ 20180411-20<br>(HMAS)* | <b>MT319458</b> | <b>MT319192</b> | <b>MT326442</b> |
| <i>L. erastii</i>     | 30SAMHYP                   | JX857796        |                 |                 |
|                       | 32bSAMHYP                  | JX857798        |                 |                 |
|                       | 36SAMHYP                   | JX857797        |                 |                 |
|                       | LWZ 20160907-5<br>(IFP)    | <b>MT319453</b> | <b>MT319188</b> |                 |
|                       | MA-Fungi 34336             | JX857800        |                 |                 |
|                       | YG 022                     | MF382992        |                 |                 |
| <i>L. fimbriatus</i>  | Wu 911204-4                | MK575210        | MK598740        |                 |
| <i>L. gatesiae</i>    | LWZ 20180515-3<br>(HMAS)   | <b>MT319447</b> | <b>MT319181</b> |                 |
|                       | LWZ 20180515-32            | <b>MT319448</b> | <b>MT319182</b> |                 |



|                            |                     |                 |                 |                 |                 |                 |                 |                 |
|----------------------------|---------------------|-----------------|-----------------|-----------------|-----------------|-----------------|-----------------|-----------------|
|                            | (HMAS)              |                 |                 |                 |                 |                 |                 |                 |
| <i>L. griseliniae</i>      | KHL 12971           | DQ873651        | DQ873651        |                 |                 |                 |                 |                 |
| <i>L. juniperi</i>         | GEL 4940            | DQ340316        |                 |                 |                 |                 |                 |                 |
|                            | Wu 0910-95          | JX175047        |                 |                 |                 |                 |                 |                 |
| <i>L. leptocystidiatus</i> | LWZ 20170814-8      | <b>MT319432</b> | <b>MT319166</b> |                 |                 |                 |                 |                 |
|                            | (IFP)               |                 |                 |                 |                 |                 |                 |                 |
|                            | LWZ 20170814-14     | <b>MT319429</b> | <b>MT319163</b> | <b>MT326512</b> | <b>MT326395</b> | <b>MT326341</b> | <b>MT326256</b> | <b>MT326576</b> |
|                            | (IFP) <sup>#*</sup> |                 |                 |                 |                 |                 |                 |                 |
|                            | LWZ 20170815-2      | <b>MT319430</b> | <b>MT319164</b> | <b>MT326513</b> |                 |                 | <b>MT326257</b> | <b>MT326577</b> |
|                            | (IFP)               |                 |                 |                 |                 |                 |                 |                 |
|                            | LWZ 20170815-30     | <b>MT319427</b> | <b>MT319161</b> | <b>MT326510</b> |                 | <b>MT326345</b> | <b>MT326259</b> | <b>MT326581</b> |
|                            | (IFP)               |                 |                 |                 |                 |                 |                 |                 |
|                            | LWZ 20170815-43     | <b>MT319428</b> | <b>MT319162</b> | <b>MT326511</b> | <b>MT326409</b> | <b>MT326343</b> | <b>MT326260</b> | <b>MT326582</b> |
|                            | (IFP)               |                 |                 |                 |                 |                 |                 |                 |
|                            | LWZ 20170818-1      | <b>MT319431</b> | <b>MT319165</b> | <b>MT326514</b> |                 | <b>MT326342</b> |                 | <b>MT326579</b> |
|                            | (IFP)               |                 |                 |                 |                 |                 |                 |                 |
|                            | LWZ 20170818-8      | <b>MT319433</b> | <b>MT319167</b> |                 |                 | <b>MT326344</b> | <b>MT326258</b> | <b>MT326580</b> |
|                            | (IFP)               |                 |                 |                 |                 |                 |                 |                 |
|                            | LWZ 20170818-9      | <b>MT319435</b> | <b>MT319169</b> |                 | <b>MT326396</b> | <b>MT326346</b> | <b>MT326292</b> | <b>MT326578</b> |
|                            | (IFP)               |                 |                 |                 |                 |                 |                 |                 |
|                            | LWZ 20170908-14     | <b>MT319434</b> | <b>MT319168</b> | <b>MT326528</b> |                 |                 |                 |                 |
|                            | (IFP)               |                 |                 |                 |                 |                 |                 |                 |
| <i>L. macrosporus</i>      | CLZhao 3951         | MN945976        |                 |                 |                 |                 |                 |                 |
|                            | CLZhao 4516         | MN945977        |                 |                 |                 |                 |                 |                 |
|                            | CLZhao 4531         | MN945978        |                 |                 |                 |                 |                 |                 |
|                            | CLZhao 8605         | MN945975        |                 |                 |                 |                 |                 |                 |

|                             |                                        |                 |                 |                 |                 |                 |                 |                 |
|-----------------------------|----------------------------------------|-----------------|-----------------|-----------------|-----------------|-----------------|-----------------|-----------------|
|                             | LWZ 20170817-2<br>(IFP) <sup>#</sup>   | <b>MT319459</b> | <b>MT319194</b> |                 | <b>MT326392</b> | <b>MT326349</b> |                 |                 |
|                             | LWZ 20180922-1<br>(HMAS)               | <b>MT319656</b> | <b>MT319195</b> |                 |                 |                 |                 |                 |
| <i>L. mascarensis</i>       | GEL 4833                               | KY800399        |                 |                 |                 |                 |                 |                 |
|                             | GEL 4908                               | KY800400        |                 |                 |                 |                 |                 |                 |
| <i>L. microfasciculatus</i> | CLZhao 4626                            | MK343568        |                 |                 |                 |                 |                 |                 |
|                             | CLZhao 5109                            | MN954311        |                 |                 |                 |                 |                 |                 |
|                             | GN 2370 (BJFC)                         | <b>MT333854</b> |                 |                 |                 |                 |                 |                 |
|                             | LWZ 20170815-37<br>(IFP) <sup>**</sup> | <b>MT319450</b> | <b>MT319184</b> | <b>MT326440</b> |                 | <b>MT326356</b> |                 | <b>MT326583</b> |
|                             | LWZ 20170816-33a<br>(IFP)              | <b>MT319449</b> | <b>MT319183</b> | <b>MT326439</b> | <b>MT326386</b> |                 |                 | <b>MT326585</b> |
|                             | LWZ 20170820-18<br>(IFP)               | <b>MT319451</b> | <b>MT319185</b> | <b>MT326441</b> | <b>MT326387</b> | <b>MT326347</b> | <b>MT326264</b> | <b>MT326584</b> |
|                             | LWZ 20180414-6<br>(HMAS)               | <b>MT319452</b> | <b>MT319186</b> |                 |                 |                 |                 |                 |
|                             | LWZ 20180921-22<br>(HMAS)              | <b>MT319654</b> | <b>MT319187</b> |                 |                 |                 |                 |                 |
|                             | TNM F24757                             | JN129976        |                 |                 |                 |                 |                 |                 |
| <i>L. orientalis</i>        | GEL 3376                               | DQ340325        |                 |                 |                 |                 |                 |                 |
|                             | GEL 3400                               | DQ340326        |                 |                 |                 |                 |                 |                 |
|                             | LWZ 20170909-7<br>(IFP)*               | <b>MT319436</b> | <b>MT319170</b> | <b>MT326529</b> |                 |                 |                 |                 |
| <i>L. organensis</i>        | MSK 7247                               | KY800403        |                 |                 |                 |                 |                 |                 |
| <i>L. pruni</i>             | Ryberg 021018                          | DQ873624        | DQ873625        |                 |                 |                 |                 |                 |

*L. sambuci*

|                                       |                 |                 |                 |                 |                 |                 |
|---------------------------------------|-----------------|-----------------|-----------------|-----------------|-----------------|-----------------|
| 18SAMHYP                              | JX857731        |                 |                 |                 |                 |                 |
| 80SAMHYP                              | JX857721        |                 |                 |                 |                 |                 |
| 83SAMHYP                              | JX857720        |                 |                 |                 |                 |                 |
| 112SAMHYP                             | JX857715        |                 |                 |                 |                 |                 |
| 125SAMHYP                             | JX857704        |                 |                 |                 |                 |                 |
| 174SAMHYP                             | JX857734        |                 |                 |                 |                 |                 |
| 176SAMHYP                             | JX857733        |                 |                 |                 |                 |                 |
| JR 7                                  | KY800402        |                 |                 |                 |                 |                 |
| LWZ 20170908-13<br>(IFP)              | <b>MT319445</b> | <b>MT319179</b> | <b>MT326530</b> |                 |                 |                 |
| LWZ 20180903-4<br>(HMAS)              | <b>MT319442</b> | <b>MT319176</b> | <b>MT326436</b> | <b>MT326411</b> |                 | <b>MT326286</b> |
| LWZ 20180903-11<br>(HMAS)             | <b>MT319440</b> | <b>MT319174</b> | <b>MT326434</b> | <b>MT326388</b> |                 |                 |
| LWZ 20180905-1<br>(HMAS)              | <b>MT319444</b> | <b>MT319178</b> | <b>MT326438</b> | <b>MT326391</b> |                 | <b>MT326291</b> |
| LWZ 20180905-2<br>(HMAS)              | <b>MT319438</b> | <b>MT319172</b> | <b>MT326433</b> | <b>MT326389</b> |                 | <b>MT326287</b> |
| LWZ 20180905-7<br>(HMAS) <sup>#</sup> | <b>MT319439</b> | <b>MT319173</b> |                 |                 | <b>MT326348</b> |                 |
| LWZ 20180905-8<br>(HMAS)*             | <b>MT319441</b> | <b>MT319175</b> | <b>MT326435</b> | <b>MT326390</b> |                 | <b>MT326288</b> |
| LWZ 20180906-7<br>(HMAS)              | <b>MT319443</b> | <b>MT319177</b> | <b>MT326437</b> |                 |                 | <b>MT326290</b> |
| LWZ 20180906-10<br>(HMAS)             | <b>MT319437</b> | <b>MT319171</b> | <b>MT326432</b> | <b>MT326412</b> |                 | <b>MT326289</b> |

|                             |                                         |                 |                 |                 |                 |
|-----------------------------|-----------------------------------------|-----------------|-----------------|-----------------|-----------------|
|                             | r112SAMHYP                              | JX857716        |                 |                 |                 |
|                             | TAAM 104263                             | MF382989        |                 |                 |                 |
| <i>L. cf. sambuci</i>       | DLL 2011-052                            | KJ140574        |                 |                 |                 |
| <i>L. cf. sambuci</i>       | DLL 2011-304                            | KJ140776        |                 |                 |                 |
| <i>L. stratosus</i>         | LR 9798                                 | KY081805        |                 |                 |                 |
|                             | LR 10025                                | KY081806        |                 |                 |                 |
| <i>L. vietnamensis</i>      | TNM F9073                               | JX175044        |                 |                 |                 |
| <i>L. wuliangshanensis</i>  | CLZhao 4108                             | MN945980        |                 |                 |                 |
|                             | CLZhao 4144                             | MN945981        |                 |                 |                 |
|                             | CLZhao 4167                             | MN945979        |                 |                 |                 |
|                             | CLZhao 4206                             | MN945982        |                 |                 |                 |
|                             | CLZhao 4475                             | MN945983        |                 |                 |                 |
| <i>Lyomyces</i> sp.         | 170SAMHYP                               | JX857770        |                 |                 |                 |
|                             | GEL 2414                                | KY800398        |                 |                 |                 |
| <i>Lyomyces</i> sp.         | LWZ 20180512-6<br>(HMAS)                | <b>MT319446</b> | <b>MT319180</b> |                 |                 |
| <i>Lyomyces</i> sp.         | LWZ 20180515-2<br>(HMAS)*               | <b>MT319460</b> | <b>MT319196</b> | <b>MT326443</b> |                 |
| <i>Lyomyces</i> sp.         | LWZ 20180515-17<br>(HMAS)               | <b>MT319461</b> | <b>MT319197</b> |                 |                 |
| <i>Lyomyces</i> sp.         | LWZ 20180906-20<br>(HMAS) <sup>#*</sup> | <b>MT319462</b> | <b>MT319198</b> | <b>MT326444</b> | <b>MT326318</b> |
| <i>Xylodon acystidiatus</i> | LWZ 20180514-9<br>(HMAS)                | <b>MT319474</b> | <b>MT319211</b> |                 |                 |
|                             | LWZ 20180515-35<br>(HMAS)               | <b>MT319473</b> | <b>MT319210</b> |                 |                 |

|                            |                  |                 |                 |                 |
|----------------------------|------------------|-----------------|-----------------|-----------------|
| <i>X. apacheriensis</i>    | Canfield 180     | KY081800        |                 |                 |
| <i>X. asperus</i>          | CLZhao 1168      | MG231625        |                 |                 |
|                            | CLZhao 1070      | MG231621        |                 |                 |
|                            | CLZhao 1076      | MG231622        |                 |                 |
|                            | CLZhao 1183      | MG231627        |                 |                 |
|                            | GN2418 (BJFC)    | <b>MT333855</b> |                 |                 |
|                            | KG Nilsson s. n. | DQ873606        | DQ873607        |                 |
|                            | UC2023169        | KP814365        |                 |                 |
| <i>X. astrocystidiatus</i> | Wu 9211-71       | JN129972        | JN129973        |                 |
| <i>X. attenuatus</i>       | Spirin 8775      | MH324476        |                 |                 |
| <i>X. australis</i>        | LWZ 20180509-8   | <b>MT319503</b> | <b>MT319248</b> |                 |
|                            | (HMAS)           |                 |                 |                 |
|                            | LWZ 20180509-15  | <b>MT319500</b> | <b>MT319246</b> | <b>MT326519</b> |
|                            | (HMAS)*          |                 |                 |                 |
|                            | LWZ 20180509-20  | <b>MT319501</b> | <b>MT319245</b> | <b>MT326457</b> |
|                            | (HMAS)           |                 |                 |                 |
|                            | LWZ 20180510-26  | <b>MT319504</b> | <b>MT319250</b> | <b>MT326459</b> |
|                            | (HMAS)           |                 |                 |                 |
|                            | LWZ 20180512-14  | <b>MT319502</b> | <b>MT319247</b> | <b>MT326458</b> |
|                            | (HMAS)           |                 |                 |                 |
|                            | LWZ 20180513-6   | <b>MT319505</b> | <b>MT319249</b> |                 |
|                            | (HMAS)           |                 |                 |                 |
| <i>X. borealis</i>         | Spirin 9416      | MH317760        | MH638259        |                 |
|                            | UC2022850        | KP814307        |                 |                 |
| <i>X. brevisetus</i>       | KHL 12386        | DQ873612        | DQ873612        |                 |
|                            | KUN 2352         | MH307753        |                 |                 |

|                          |                                       |                 |                 |                 |                 |                 |                 |
|--------------------------|---------------------------------------|-----------------|-----------------|-----------------|-----------------|-----------------|-----------------|
|                          | UC2023199                             | KP814485        |                 |                 |                 |                 |                 |
| <i>X. cf. brevisetus</i> | UC2023212                             | KP814495        |                 |                 |                 |                 |                 |
|                          | UC2023234                             | KP814497        |                 |                 |                 |                 |                 |
| <i>X. crystalliger</i>   | KUN 2312                              | MH324477        |                 |                 |                 |                 |                 |
|                          | LWZ 20170815-7<br>(IFP) <sup>#*</sup> | <b>MT319520</b> | <b>MT319268</b> | <b>MT326467</b> | <b>MT326383</b> |                 | <b>MT326273</b> |
|                          | LWZ 20170816-33<br>(IFP)              | <b>MT319521</b> | <b>MT319269</b> | <b>MT326468</b> |                 | <b>MT326334</b> | <b>MT326253</b> |
| <i>X. cystidiatus</i>    | FR-0249200                            | MH880195        | MH884896        |                 |                 |                 |                 |
| <i>X. damansaraensis</i> | LWZ 20180417-4<br>(HMAS)*             | <b>MT319496</b> | <b>MT319241</b> | <b>MT326525</b> |                 |                 |                 |
|                          | LWZ 20180417-20<br>(HMAS)             | <b>MT319497</b> | <b>MT319242</b> |                 |                 |                 |                 |
|                          | LWZ 20180417-22<br>(HMAS)             | <b>MT319498</b> | <b>MT319243</b> |                 |                 |                 |                 |
|                          | LWZ 20180417-23<br>(HMAS)             | <b>MT319499</b> | <b>MT319244</b> | <b>MT326456</b> |                 |                 |                 |
| <i>X. detriticus</i>     | Zíbarová 26.05.17                     | MH320794        | MH638264        |                 |                 |                 |                 |
|                          | Zíbarová 30.10.17                     | MH320793        | MH651372        |                 |                 |                 |                 |
| <i>X. filicinus</i>      | MSK-F 12869                           | MH880199        | MH884899        |                 |                 |                 |                 |
|                          | MSK-F 12870                           | MH880200        | MH884900        |                 |                 |                 |                 |
| <i>X. flaviporus</i>     | CLZhao 2384                           | MH114732        |                 |                 |                 |                 |                 |
|                          | Cui 11838 (BJFC)                      | <b>MT319544</b> | <b>MT319271</b> |                 |                 |                 |                 |
|                          | Dai 9996 (IFP)                        | <b>MT319554</b> |                 |                 |                 |                 |                 |
|                          | Dai 12797 (BJFC)                      | <b>MT319555</b> | <b>MT319278</b> | <b>MT326541</b> | <b>MT326413</b> |                 | <b>MT326310</b> |
|                          | Dai 12808 (BJFC)                      | <b>MT319551</b> | <b>MT319275</b> | <b>MT326540</b> | <b>MT326414</b> |                 | <b>MT326311</b> |

|                          |                 |                 |                 |                 |                 |                 |  |
|--------------------------|-----------------|-----------------|-----------------|-----------------|-----------------|-----------------|--|
| Dai 14651 (BJFC)         | <b>MT319542</b> |                 |                 |                 |                 |                 |  |
| Dai 16248 (BJFC)         | <b>MT319557</b> | <b>MT319280</b> |                 |                 |                 |                 |  |
| DLL 2011-134             | KJ140637        |                 |                 |                 |                 |                 |  |
| FCUG 1053                | AF145575        |                 |                 |                 |                 |                 |  |
| FR-0249797               | MH880201        | MH884901        |                 |                 |                 |                 |  |
| GEL 3462                 | MH880202        |                 |                 |                 |                 |                 |  |
| GEL 5047                 | MH880203        |                 |                 |                 |                 |                 |  |
| ICMP 13836               | AF145585        |                 |                 |                 |                 |                 |  |
| JV 1808/40               | <b>MT319522</b> | <b>MT319290</b> |                 |                 |                 |                 |  |
| JV 1808/65               | <b>MT319523</b> | <b>MT319291</b> |                 |                 |                 |                 |  |
| JV 1808/137              | <b>MT319524</b> | <b>MT319292</b> |                 |                 |                 |                 |  |
| LWZ 20150707-8<br>(IFP)  | <b>MT319561</b> | <b>MT319283</b> | <b>MT326542</b> |                 |                 |                 |  |
| LWZ 20150708-1<br>(IFP)  | <b>MT319553</b> | <b>MT319277</b> | <b>MT326473</b> | <b>MT326405</b> | <b>MT326328</b> | <b>MT326252</b> |  |
| LWZ 20150726-10<br>(IFP) | <b>MT319560</b> | <b>MT319282</b> |                 |                 |                 |                 |  |
| LWZ 20150826-1<br>(IFP)  | <b>MT319548</b> | <b>MT319274</b> | <b>MT326472</b> |                 | <b>MT326333</b> |                 |  |
| LWZ 20160318-1<br>(IFP)  | <b>MT319558</b> | <b>MT319281</b> |                 |                 |                 |                 |  |
| LWZ 20160318-6<br>(IFP)  | <b>MT319559</b> |                 |                 | <b>MT326380</b> |                 |                 |  |
| LWZ 20170814-23<br>(IFP) | <b>MT319543</b> | <b>MT319270</b> | <b>MT326469</b> | <b>MT326376</b> | <b>MT326331</b> | <b>MT326271</b> |  |
| LWZ 20170820-43          | <b>MT319556</b> | <b>MT319279</b> | <b>MT326474</b> | <b>MT326377</b> | <b>MT326329</b> | <b>MT326272</b> |  |

|                             |                     |                 |                 |                 |                 |                 |                 |
|-----------------------------|---------------------|-----------------|-----------------|-----------------|-----------------|-----------------|-----------------|
|                             | (IFP)               |                 |                 |                 |                 |                 |                 |
|                             | LWZ 20171014-2      | <b>MT319563</b> | <b>MT319284</b> | <b>MT326475</b> | <b>MT326381</b> |                 |                 |
|                             | (IFP)               |                 |                 |                 |                 |                 |                 |
|                             | LWZ 20171026-1      | <b>MT319546</b> | <b>MT319272</b> | <b>MT326470</b> | <b>MT326379</b> | <b>MT326330</b> |                 |
|                             | (IFP)               |                 |                 |                 |                 |                 |                 |
|                             | LWZ 20171026-11     | <b>MT319547</b> | <b>MT319273</b> | <b>MT326471</b> | <b>MT326378</b> | <b>MT326332</b> | <b>MT326277</b> |
|                             | (IFP) <sup>#*</sup> |                 |                 |                 |                 |                 |                 |
|                             | LWZ 20180415-13     | <b>MT319552</b> | <b>MT319276</b> |                 |                 |                 |                 |
|                             | (HMAS)              |                 |                 |                 |                 |                 |                 |
|                             | MA-Fungi 79440      | MH260071        | MH260066        |                 |                 |                 |                 |
|                             | Yuan 4271 (IFP)     | <b>MT319550</b> |                 |                 |                 |                 |                 |
|                             | Yuan 4314 (IFP)     | <b>MT319562</b> |                 |                 |                 |                 |                 |
|                             | Yuan 4541 (IFP)     | <b>MT319549</b> |                 |                 |                 |                 |                 |
|                             | Yuan 4544 (IFP)     | <b>MT319545</b> |                 |                 |                 |                 |                 |
|                             | Yuan 4588 (IFP)     | <b>MT319564</b> |                 |                 |                 |                 |                 |
| <i>'X. ovisporus'</i>       | GC 1609-41          | MF540764        |                 |                 |                 |                 |                 |
| <i>'X. ovisporus'</i>       | Wu 910322           | MF540765        |                 |                 |                 |                 |                 |
| <i>'X. ovisporus'</i>       | Wu 1207-25          | MF540766        |                 |                 |                 |                 |                 |
| <i>X. follis</i>            | FR-0249814          | MH880204        | MH884902        |                 |                 |                 |                 |
| <i>X. hastifer</i>          | Ryvarden 19767      | KY081801        |                 |                 |                 |                 |                 |
| <i>X. heterocystidiatus</i> | LWZ 20171015-8      | <b>MT319513</b> | <b>MT319263</b> | <b>MT326465</b> |                 |                 |                 |
|                             | (IFP)               |                 |                 |                 |                 |                 |                 |
|                             | LWZ 20171015-15     | <b>MT319514</b> |                 |                 |                 |                 |                 |
|                             | (IFP)               |                 |                 |                 |                 |                 |                 |
|                             | LWZ 20171015-29     | <b>MT319516</b> | <b>MT319262</b> | <b>MT326464</b> |                 |                 | <b>MT326278</b> |
|                             | (IFP)               |                 |                 |                 |                 |                 |                 |



|                         |                                        |                 |                 |                 |                 |                 |                 |
|-------------------------|----------------------------------------|-----------------|-----------------|-----------------|-----------------|-----------------|-----------------|
|                         | LWZ 20171015-30<br>(IFP)*              | <b>MT319517</b> | <b>MT319261</b> | <b>MT326463</b> |                 | <b>MT326336</b> |                 |
|                         | LWZ 20171015-33<br>(IFP) <sup>#</sup>  | <b>MT319518</b> | <b>MT319264</b> | <b>MT326466</b> | <b>MT326382</b> | <b>MT326337</b> | <b>MT326285</b> |
|                         | LWZ 20180921-19<br>(HMAS)              | <b>MT319676</b> | <b>MT319266</b> |                 |                 |                 |                 |
|                         | LWZ 20180922-45<br>(HMAS)              | <b>MT319659</b> | <b>MT319265</b> | <b>MT326538</b> |                 |                 |                 |
|                         | Wu 9209-27                             | JX175045        |                 |                 |                 |                 |                 |
|                         | Wu 9312-20                             | JX175046        |                 |                 |                 |                 |                 |
| <i>X. hyphodontinus</i> | GEL 9222                               | MH880205        | MH884903        |                 |                 |                 |                 |
|                         | GG-GUY13-044                           | MH880206        | MH884904        |                 |                 |                 |                 |
|                         | GG-MAR12-238                           | MH880207        | MH884905        |                 |                 |                 |                 |
|                         | GG-MAR15-127                           | MH880208        | MH884906        |                 |                 |                 |                 |
| <i>X. kunmingensis</i>  | CLZhao 230                             | MK404528        |                 |                 |                 |                 |                 |
|                         | CLZhao 752                             | MK404529        |                 |                 |                 |                 |                 |
|                         | CLZhao 755                             | MK404530        |                 |                 |                 |                 |                 |
|                         | CLZhao 3010                            | MK404531        |                 |                 |                 |                 |                 |
|                         | CLZhao 3019                            | MK404532        |                 |                 |                 |                 |                 |
|                         | LWZ 20170820-41<br>(IFP) <sup>#*</sup> | <b>MT319512</b> | <b>MT319259</b> | <b>MT326462</b> | <b>MT326399</b> | <b>MT326335</b> | <b>MT326274</b> |
|                         | LWZ 20171026-14<br>(IFP)               | <b>MT319511</b> | <b>MT319258</b> | <b>MT326461</b> |                 |                 | <b>MT326284</b> |
| <i>= X. exilis</i>      | MSK-F 7381                             | MH880196        |                 |                 |                 |                 |                 |
|                         | TUB-FO 42450                           | MH880197        |                 |                 |                 |                 |                 |
|                         | TUB-FO 42565                           | MH880198        | MH884898        |                 |                 |                 |                 |

|                             |                            |                 |                 |                 |
|-----------------------------|----------------------------|-----------------|-----------------|-----------------|
| <i>X. lagenicystidiatus</i> | LWZ 20180513-16<br>(HMAS)  | <b>MT319634</b> | <b>MT319368</b> |                 |
|                             | LWZ 20180515-1<br>(HMAS)   | <b>MT319632</b> |                 |                 |
|                             | LWZ 20180515-14<br>(HMAS)* | <b>MT319633</b> | <b>MT319367</b> | <b>MT326499</b> |
| <i>X. lenis</i>             | Cui 5950                   | KT989972        |                 |                 |
|                             | Wu 0808-32                 | JX175043        |                 |                 |
|                             | Wu 890714-3                | KY081802        |                 |                 |
| <i>X. mollissimus</i>       | LWZ 20160318-3<br>(IFP)*   | KY007517        | <b>MT319347</b> | <b>MT326555</b> |
|                             | Yuan 4391 (IFP)            | <b>MT319609</b> |                 |                 |
|                             | Yuan 4562 (IFP)            | <b>MT319610</b> |                 |                 |
|                             | Yuan 4568 (IFP)            | <b>MT319611</b> |                 |                 |
| <i>X. nesporii</i>          | B Nordén 030915            | DQ873622        | DQ873622        |                 |
|                             | CLZhao 879                 | MH114737        |                 |                 |
|                             | CLZhao 898                 | MG231640        |                 |                 |
|                             | CLZhao 944                 | MH114738        |                 |                 |
|                             | CLZhao 958                 | MH114739        |                 |                 |
|                             | CLZhao 1181                | MG231645        |                 |                 |
|                             | CLZhao 3988                | MH114741        |                 |                 |
|                             | GEL 3290                   | DQ340309        |                 |                 |
|                             | GEL 3302                   | DQ340308        |                 |                 |
|                             | GEL 3309                   | DQ340307        |                 |                 |
|                             | JR 14                      | MH880210        |                 |                 |
|                             | KUC 20130712-14            | KJ668518        |                 |                 |

|                           |                 |                 |                 |                 |                 |                 |  |
|---------------------------|-----------------|-----------------|-----------------|-----------------|-----------------|-----------------|--|
| KUC 20161012-50           | MF774797        |                 |                 |                 |                 |                 |  |
| LWZ 20170815-13<br>(IFP)  | <b>MT319661</b> | <b>MT319239</b> |                 |                 |                 |                 |  |
| LWZ 20170815-13a<br>(IFP) | <b>MT319662</b> | <b>MT319240</b> |                 |                 |                 |                 |  |
| LWZ 20170909-9<br>(IFP)   | <b>MT319495</b> | <b>MT319236</b> | <b>MT326531</b> | <b>MT326403</b> |                 |                 |  |
| LWZ 20171016-12<br>(IFP)* | <b>MT319493</b> | <b>MT319235</b> | <b>MT326455</b> | <b>MT326384</b> | <b>MT326353</b> | <b>MT326262</b> |  |
| LWZ 20171016-18<br>(IFP)  | <b>MT319494</b> | <b>MT319234</b> | <b>MT326454</b> | <b>MT326385</b> | <b>MT326354</b> | <b>MT326263</b> |  |
| LWZ 20180509-4<br>(HMAS)  | <b>MT319488</b> | <b>MT319229</b> |                 |                 |                 |                 |  |
| LWZ 20180509-14<br>(HMAS) | <b>MT319492</b> | <b>MT319233</b> |                 |                 |                 |                 |  |
| LWZ 20180514-1<br>(HMAS)  | <b>MT319489</b> | <b>MT319230</b> |                 |                 |                 |                 |  |
| LWZ 20180514-12<br>(HMAS) | <b>MT319490</b> | <b>MT319232</b> |                 |                 |                 |                 |  |
| LWZ 20180514-13<br>(HMAS) | <b>MT319491</b> | <b>MT319231</b> |                 |                 |                 |                 |  |
| LWZ 20180804-27<br>(HMAS) | <b>MT319647</b> | <b>MT319237</b> | <b>MT326532</b> |                 |                 |                 |  |
| LWZ 20180921-35<br>(HMAS) | <b>MT319655</b> | <b>MT319238</b> | <b>MT326533</b> |                 |                 |                 |  |
| LWZ 20180922-31           | <b>MT319675</b> |                 |                 |                 |                 |                 |  |

|                             |                     |                 |                 |                 |                 |                 |                 |  |  |
|-----------------------------|---------------------|-----------------|-----------------|-----------------|-----------------|-----------------|-----------------|--|--|
|                             | (HMAS)              |                 |                 |                 |                 |                 |                 |  |  |
| <i>X. niemelaei</i>         | Cui 11116 (BJFC)    | <b>MT319631</b> |                 |                 |                 |                 |                 |  |  |
|                             | Dai 15358 (BJFC)    | <b>MT319623</b> | <b>MT319359</b> |                 |                 |                 |                 |  |  |
|                             | Dai 16269 (BJFC)    | <b>MT319624</b> | <b>MT319360</b> |                 |                 |                 |                 |  |  |
|                             | FR-0219860          | MH880211        |                 |                 |                 |                 |                 |  |  |
|                             | FR-0249174          | MH880212        |                 |                 |                 |                 |                 |  |  |
|                             | GC 1508-146         | KX857798        |                 |                 |                 |                 |                 |  |  |
|                             | GEL 4998            | EU583422        |                 |                 |                 |                 |                 |  |  |
|                             | LWZ 20150707-13     | <b>MT319630</b> | <b>MT319365</b> |                 |                 |                 |                 |  |  |
|                             | (IFP)               |                 |                 |                 |                 |                 |                 |  |  |
|                             | LWZ 20150707-15     | <b>MT319627</b> |                 |                 |                 |                 |                 |  |  |
|                             | (IFP)               |                 |                 |                 |                 |                 |                 |  |  |
|                             | LWZ 20150709-2      | <b>MT319626</b> | <b>MT319362</b> |                 | <b>MT326406</b> | <b>MT326358</b> | <b>MT326254</b> |  |  |
|                             | (IFP)               |                 |                 |                 |                 |                 |                 |  |  |
|                             | LWZ 20171015-12     | <b>MT319625</b> | <b>MT319361</b> | <b>MT326498</b> | <b>MT326407</b> | <b>MT326359</b> |                 |  |  |
|                             | (IFP) <sup>#*</sup> |                 |                 |                 |                 |                 |                 |  |  |
|                             | Wu 1010-62          | KX857799        |                 |                 |                 |                 |                 |  |  |
|                             | Yuan 5730 (IFP)     | <b>MT319629</b> | <b>MT319364</b> |                 |                 |                 |                 |  |  |
|                             | Yuan 5773 (IFP)     | <b>MT319622</b> | <b>MT319358</b> |                 |                 |                 |                 |  |  |
|                             | Yuan 5891 (IFP)     | <b>MT319628</b> | <b>MT319363</b> |                 |                 |                 |                 |  |  |
| ‘ <i>X. apacheriensis</i> ’ | Wu 0910-58          | KX857797        |                 |                 |                 |                 |                 |  |  |
| = <i>X. jacobaeus</i>       | MA-Fungi 91339      | MH430072        | MH430071        |                 |                 |                 |                 |  |  |
|                             | MA-Fungi 91340      | MH430073        |                 |                 |                 |                 |                 |  |  |
|                             | MA-Fungi 91338      | MH430074        |                 |                 |                 |                 |                 |  |  |
| = <i>X. reticulatus</i>     | GC 1512-1           | KX857808        | KX857813        |                 |                 |                 |                 |  |  |
|                             | KUC 20160721B-26    | MF774798        |                 |                 |                 |                 |                 |  |  |

|                          |                          |                 |                 |                 |
|--------------------------|--------------------------|-----------------|-----------------|-----------------|
| = <i>X. rhizomorphus</i> | Wu 1109-178              | KX857805        |                 |                 |
|                          | Dai 12354                | KF917544        |                 |                 |
|                          | Dai 12367                | KF917545        |                 |                 |
|                          | Dai 12389                | KF917546        |                 |                 |
| <i>X. nongravis</i>      | CHWC 1506-2              | KX857800        |                 |                 |
|                          | CLZhao 3190              | MH114745        |                 |                 |
|                          | CLZhao 3196              | MH114747        |                 |                 |
|                          | Dai 11686 (BJFC)         | <b>MT319614</b> | <b>MT319350</b> |                 |
|                          | Dai 15321                | KT989969        |                 |                 |
|                          | GC 1412-22               | KX857801        | KX857818        |                 |
|                          | LWZ 20150731-19<br>(IFP) | <b>MT319613</b> | <b>MT319349</b> | <b>MT326394</b> |
|                          | LWZ 20160318-5<br>(IFP)  | <b>MT319612</b> | <b>MT319348</b> |                 |
|                          | Spirin 5763              | MH324469        |                 |                 |
|                          | ICMP 13839               | AF145582        | MH260064        |                 |
| <i>X. nothofagi</i>      | ICMP 13842               | AF145583        |                 |                 |
|                          | PDD 91630                | GQ411524        |                 |                 |
| <i>X. ovisporus</i>      | CLZhao 178               | MG231651        |                 |                 |
|                          | CLZhao 240               | MG231653        |                 |                 |
|                          | CLZhao 316               | MH114922        |                 |                 |
|                          | CLZhao 321               | MH114923        |                 |                 |
|                          | CLZhao 759               | MG231668        |                 |                 |
|                          | CLZhao 1050              | MG231674        |                 |                 |
|                          | CLZhao 1508              | MG231691        |                 |                 |
|                          | CLZhao 4028              | MH114774        |                 |                 |

|                         |                 |                 |                 |                          |
|-------------------------|-----------------|-----------------|-----------------|--------------------------|
| CLZhao 4739             | MH114779        |                 |                 |                          |
| CLZhao 4757             | MH114786        |                 |                 |                          |
| Cui 12060 (BJFC)        | <b>MT319581</b> | <b>MT319319</b> | <b>MT326549</b> | <b>MT326297</b>          |
| Cui 12304 (BJFC)        | <b>MT319596</b> | <b>MT319332</b> |                 | <b>MT326306</b>          |
| Dai 13058 (BJFC)        | <b>MT319593</b> |                 |                 | <b>MT326295</b>          |
| Dai 13824 (BJFC)        | <b>MT319587</b> | <b>MT319325</b> | <b>MT326552</b> | <b>MT326301</b>          |
| Dai 14958 (BJFC)        | <b>MT319605</b> |                 |                 | <b>MT326299</b>          |
| Dai 15460 (BJFC)        | <b>MT319582</b> | <b>MT319320</b> | <b>MT326550</b> | <b>MT326300</b>          |
| Dai 15618 (BJFC)        | <b>MT319606</b> | <b>MT319339</b> |                 | <b>MT326304</b>          |
| Dai 15626 (BJFC)        | <b>MT319575</b> |                 |                 | <b>MT326296</b>          |
| Dai 15627 (BJFC)        | <b>MT319576</b> | <b>MT319314</b> |                 | <b>MT326302</b>          |
| Dai 15628 (BJFC)        | <b>MT319595</b> |                 |                 |                          |
| Dai 15682 (BJFC)        | <b>MT319588</b> | <b>MT319326</b> | <b>MT326553</b> | <b>MT326307</b>          |
| Dai 15688 (BJFC)        | <b>MT319571</b> | <b>MT319312</b> |                 | <b>MT326303</b>          |
| Dai 15699 (BJFC)        | <b>MT319572</b> |                 |                 |                          |
| Dai 15722 (BJFC)        | <b>MT319594</b> | <b>MT319331</b> |                 | <b>MT326305</b>          |
| Dai 15724 (BJFC)        | <b>MT319585</b> | <b>MT319323</b> | <b>MT326551</b> | <b>MT326308</b>          |
| Dai 15730 (BJFC)        | <b>MT319592</b> | <b>MT319329</b> | <b>MT326554</b> | <b>MT326298</b>          |
| Dai 16306 (BJFC)        | <b>MT319591</b> |                 |                 |                          |
| GEL 3493                | EU583421        |                 |                 |                          |
| ICMP 13830              | AF145584        |                 |                 |                          |
| ICMP 13835              | AF145586        | MH260063        |                 |                          |
| KUC 20130725-29         | KJ668513        |                 |                 |                          |
| LWZ 20140726-7<br>(IFP) | <b>MT319604</b> |                 | <b>MT326367</b> |                          |
| LWZ 20141122-1          | <b>MT319574</b> |                 | <b>MT326404</b> | <b>MT326352 MT326240</b> |

|                 |          |          |          |          |          |          |
|-----------------|----------|----------|----------|----------|----------|----------|
| (IFP)           |          |          |          |          |          |          |
| LWZ 20150622-6  | MT319598 | MT319333 |          |          |          |          |
| (IFP)           |          |          |          |          |          |          |
| LWZ 20150705-1  | MT319573 | MT319313 |          |          |          |          |
| (IFP)           |          |          |          |          |          |          |
| LWZ 20150708-15 | MT319579 | MT319317 | MT326486 |          | MT326319 | MT326251 |
| (IFP)           |          |          |          |          |          |          |
| LWZ 20150710-3  | MT319580 | MT319318 | MT326548 |          |          |          |
| (IFP)           |          |          |          |          |          |          |
| LWZ 20150710-5  | MT319602 | MT319338 |          |          |          |          |
| (IFP)           |          |          |          |          |          |          |
| LWZ 20150727-1  | MT319603 | MT319337 | MT326492 |          |          |          |
| (IFP)           |          |          |          |          |          |          |
| LWZ 20150802-7  | MT319599 | MT319334 |          |          |          |          |
| (IFP)           |          |          |          |          |          |          |
| LWZ 20150802-19 | MT319577 | MT319315 |          |          |          |          |
| (IFP)           |          |          |          |          |          |          |
| LWZ 20170814-6  | MT319607 | MT319340 | MT326493 | MT326374 | MT326351 | MT326247 |
| (IFP)           |          |          |          |          |          |          |
| LWZ 20170814-12 | MT319583 | MT319321 | MT326487 | MT326368 | MT326322 | MT326246 |
| (IFP)           |          |          |          |          |          |          |
| LWZ 20170814-18 | MT319584 | MT319322 |          | MT326371 | MT326323 | MT326243 |
| (IFP)           |          |          |          |          |          |          |
| LWZ 20170815-16 | MT319663 | MT319343 |          |          |          |          |
| (IFP)           |          |          |          |          |          |          |
| LWZ 20170815-31 | MT319666 | MT319346 |          |          |          |          |

|                 |                 |                 |                 |                 |                 |                 |  |
|-----------------|-----------------|-----------------|-----------------|-----------------|-----------------|-----------------|--|
| (IFP)           |                 |                 |                 |                 |                 |                 |  |
| LWZ 20170815-33 | <b>MT319589</b> | <b>MT319327</b> | <b>MT326523</b> | <b>MT326369</b> | <b>MT326325</b> | <b>MT326248</b> |  |
| (IFP)#*         |                 |                 |                 |                 |                 |                 |  |
| LWZ 20170815-39 | <b>MT319600</b> | <b>MT319335</b> | <b>MT326490</b> |                 | <b>MT326324</b> | <b>MT326241</b> |  |
| (IFP)           |                 |                 |                 |                 |                 |                 |  |
| LWZ 20170815-41 | <b>MT319667</b> | <b>MT319345</b> |                 |                 |                 |                 |  |
| (IFP)           |                 |                 |                 |                 |                 |                 |  |
| LWZ 20170815-45 | <b>MT319669</b> | <b>MT319344</b> |                 |                 |                 |                 |  |
| (IFP)           |                 |                 |                 |                 |                 |                 |  |
| LWZ 20170816-13 | <b>MT319586</b> | <b>MT319324</b> | <b>MT326488</b> | <b>MT326370</b> | <b>MT326320</b> | <b>MT326245</b> |  |
| (IFP)           |                 |                 |                 |                 |                 |                 |  |
| LWZ 20170817-4  | <b>MT319578</b> | <b>MT319316</b> |                 |                 | <b>MT326357</b> | <b>MT326250</b> |  |
| (IFP)           |                 |                 |                 |                 |                 |                 |  |
| LWZ 20170818-7  | <b>MT319608</b> | <b>MT319341</b> | <b>MT326494</b> | <b>MT326373</b> | <b>MT326326</b> | <b>MT326244</b> |  |
| (IFP)           |                 |                 |                 |                 |                 |                 |  |
| LWZ 20170818-19 | <b>MT319601</b> | <b>MT319336</b> | <b>MT326491</b> | <b>MT326372</b> | <b>MT326321</b> | <b>MT326249</b> |  |
| (IFP)           |                 |                 |                 |                 |                 |                 |  |
| LWZ 20171015-9  | <b>MT319597</b> | <b>MT319330</b> |                 |                 |                 |                 |  |
| (IFP)           |                 |                 |                 |                 |                 |                 |  |
| LWZ 20171015-10 | <b>MT319590</b> | <b>MT319328</b> | <b>MT326489</b> | <b>MT326375</b> | <b>MT326327</b> | <b>MT326242</b> |  |
| (IFP)           |                 |                 |                 |                 |                 |                 |  |
| LWZ 20180919-12 | <b>MT319648</b> | <b>MT319342</b> |                 |                 |                 |                 |  |
| (HMAS)          |                 |                 |                 |                 |                 |                 |  |
| LWZ 20180920-1  | <b>MT319649</b> | <b>MT319289</b> | <b>MT326546</b> |                 |                 |                 |  |
| (HMAS)          |                 |                 |                 |                 |                 |                 |  |
| LWZ 20180920-10 | <b>MT319650</b> | <b>MT319286</b> | <b>MT326543</b> |                 |                 |                 |  |



|                          |                   |                 |                 |                 |                 |
|--------------------------|-------------------|-----------------|-----------------|-----------------|-----------------|
|                          | (HMAS)            |                 |                 |                 |                 |
|                          | LWZ 20180920-22   | <b>MT319652</b> | <b>MT319287</b> | <b>MT326544</b> |                 |
|                          | (HMAS)            |                 |                 |                 |                 |
|                          | LWZ 20180921-4    | <b>MT319653</b> | <b>MT319288</b> | <b>MT326545</b> |                 |
|                          | (HMAS)            |                 |                 |                 |                 |
| <i>'X. flaviporus'</i>   | GC 1509-71        | MF540761        |                 |                 |                 |
|                          | GC 1607-3         | MF540762        |                 |                 |                 |
|                          | Wu 0211-53        | MF540763        |                 |                 |                 |
| <i>X. paradoxus</i>      | CBS 316.53        | MH857217        |                 |                 |                 |
|                          | CBS 317.53        | MH857218        |                 |                 |                 |
|                          | CBS 318.53        | MH857219        |                 |                 |                 |
|                          | CBS 319.53        | MH857220        |                 |                 |                 |
|                          | Dai 14983 (BJFC)* | <b>MT319519</b> | <b>MT319267</b> | <b>MT326539</b> | <b>MT326416</b> |
|                          | FCUG 1517         | AF145572        |                 |                 |                 |
|                          | FCUG 2425         | AF145571        | AY059067        |                 |                 |
|                          | JR 06             | MH880219        |                 |                 |                 |
|                          | MA-Fungi 70444    | MH260070        | MH260065        |                 |                 |
|                          | MA-Fungi 81294    | MH260072        |                 |                 |                 |
|                          | Miettinen 7978    | FN907912        |                 |                 |                 |
| <i>X. pseudotropicus</i> | Dai 10758         | KF917542        |                 |                 |                 |
|                          | Dai 10765         | KT989974        |                 |                 |                 |
|                          | Dai 10768         | KF917543        |                 |                 |                 |
|                          | Dai 16167 (BJFC)  | <b>MT319509</b> | <b>MT319255</b> | <b>MT326536</b> | <b>MT326312</b> |
|                          | LWZ 20170817-1    | <b>MT319507</b> | <b>MT319254</b> | <b>MT326460</b> | <b>MT326255</b> |
|                          | (IFP)*            |                 |                 |                 |                 |
| <i>X. pruinosis</i>      | Spirin 2877       | MH332700        |                 |                 |                 |

|                           |                                        |                 |                 |                 |                 |                 |                 |                 |  |
|---------------------------|----------------------------------------|-----------------|-----------------|-----------------|-----------------|-----------------|-----------------|-----------------|--|
|                           | UC2023108                              | KP814412        |                 |                 |                 |                 |                 |                 |  |
| <i>X. pseudolanatus</i>   | FP-150922                              | MH880220        | MH884909        |                 |                 |                 |                 |                 |  |
| <i>X. quercinus</i>       | H 6013352                              | KT361632        |                 |                 |                 |                 |                 |                 |  |
|                           | KHL 11076                              | KT361633        | AY586678        |                 |                 |                 |                 |                 |  |
|                           | Kotiranta 27060                        | MH320792        |                 |                 |                 |                 |                 |                 |  |
|                           | MA-Fungi 91311                         | MH260073        | MH260067        |                 |                 |                 |                 |                 |  |
|                           | Spirin 8565                            | MH316007        |                 |                 |                 |                 |                 |                 |  |
|                           | Spirin 8840                            | MH320791        |                 |                 |                 |                 |                 |                 |  |
| <i>X. ramicida</i>        | Spirin 7664                            | KT361634        |                 |                 |                 |                 |                 |                 |  |
| <i>X. rhododendricola</i> | LWZ 20180512-4<br>(HMAS)*              | <b>MT319619</b> | <b>MT319355</b> | <b>MT326497</b> |                 |                 |                 |                 |  |
|                           | LWZ 20180513-3<br>(HMAS)               | <b>MT319620</b> | <b>MT319356</b> |                 |                 |                 |                 |                 |  |
|                           | LWZ 20180513-9<br>(HMAS)               | <b>MT319621</b> | <b>MT319357</b> |                 |                 |                 |                 |                 |  |
| <i>X. rimosissimus</i>    | DLL 2011-081                           | KJ140600        |                 |                 |                 |                 |                 |                 |  |
|                           | Ryberg 021031                          | DQ873627        | DQ873628        |                 |                 |                 |                 |                 |  |
|                           | UC2022842                              | KP814311        |                 |                 |                 |                 |                 |                 |  |
|                           | UC2023109                              | KP814414        |                 |                 |                 |                 |                 |                 |  |
|                           | UC2023147                              | KP814193        |                 |                 |                 |                 |                 |                 |  |
|                           | UC2023148                              | KP814194        |                 |                 |                 |                 |                 |                 |  |
| <i>X. serpentiformis</i>  | FO 40675                               | MH880228        |                 |                 |                 |                 |                 |                 |  |
|                           | FO 42688                               | MH880229        | MH884913        |                 |                 |                 |                 |                 |  |
|                           | GEL 3668                               | MH880227        |                 |                 |                 |                 |                 |                 |  |
|                           | LWZ 20170815-14<br>(IFP) <sup>#*</sup> | <b>MT319477</b> | <b>MT319214</b> | <b>MT326517</b> | <b>MT326363</b> | <b>MT326362</b> | <b>MT326265</b> | <b>MT326586</b> |  |

|                       |                                        |          |          |          |          |          |          |          |
|-----------------------|----------------------------------------|----------|----------|----------|----------|----------|----------|----------|
| <i>X. spathulatus</i> | LWZ 20170815-17<br>(IFP)               | MT319664 | MT319216 |          |          |          |          |          |
|                       | LWZ 20170815-18<br>(IFP)               | MT319478 | MT319215 | MT326518 | MT326366 | MT326338 | MT326267 | MT326588 |
|                       | LWZ 20170815-29<br>(IFP)               | MT319665 | MT319220 |          |          |          |          |          |
|                       | LWZ 20170815-42<br>(IFP)               | MT319668 | MT319219 |          |          |          |          |          |
|                       | LWZ 20170816-11<br>(IFP)               | MT319475 | MT319212 | MT326515 | MT326364 | MT326340 | MT326266 | MT326589 |
|                       | LWZ 20170816-12<br>(IFP)               | MT319672 | MT319217 |          |          |          |          |          |
|                       | LWZ 20170816-15<br>(IFP)               | MT319673 | MT319218 |          |          |          |          |          |
|                       | LWZ 20170818-4<br>(IFP)                | MT319476 | MT319213 | MT326516 | MT326365 | MT326339 | MT326268 | MT326587 |
|                       | CLZhao 184                             | MG231628 |          |          |          |          |          |          |
|                       | Cui 6834 (BJFC)                        | MT319618 |          |          |          |          |          |          |
|                       | Cui 12887                              | KY290982 |          |          |          |          |          |          |
|                       | Cui 12888                              | KY290983 |          |          |          |          |          |          |
|                       | GEL 2690                               | KY081803 |          |          |          |          |          |          |
|                       | KHL 7085                               | KY081804 |          |          |          |          |          |          |
|                       | LWZ 20180804-10<br>(HMAS)              | MT319646 | MT319354 | MT326556 |          |          |          |          |
|                       | LWZ 20180808-4<br>(HMAS) <sup>#*</sup> | MT319616 | MT319352 | MT326495 |          |          | MT326280 |          |

|                                                  |                           |                 |                 |                 |                 |
|--------------------------------------------------|---------------------------|-----------------|-----------------|-----------------|-----------------|
| <i>X. subclavatus</i><br><i>X. subflaviporus</i> | LWZ 20180808-5<br>(HMAS)  | <b>MT319617</b> | <b>MT319353</b> | <b>MT326496</b> | <b>MT326281</b> |
|                                                  | LWZ 20180906-19<br>(HMAS) | <b>MT319615</b> | <b>MT319351</b> |                 |                 |
|                                                  | MMS 7224                  | MH880230        |                 |                 |                 |
|                                                  | MSK-F 12931               | MH880231        | MH884914        |                 |                 |
|                                                  | Wu 1307-42                | KX857802        |                 |                 |                 |
|                                                  | Wu 1407-105               | KX857804        | KX857811        |                 |                 |
|                                                  | FO 42167                  | MH880232        |                 |                 |                 |
|                                                  | A46                       | KC414243        |                 |                 |                 |
|                                                  | CLZhao 2160               | MH114755        |                 |                 |                 |
|                                                  | CLZhao 2176               | MH114758        |                 |                 |                 |
|                                                  | Dai 16413 (BJFC)          | <b>MT319567</b> | <b>MT319310</b> | <b>MT326547</b> | <b>MT326415</b> |
|                                                  | Dollinger 698             | KY264045        |                 |                 | <b>MT326309</b> |
|                                                  | Dollinger 772             | KY264046        |                 |                 |                 |
|                                                  | FLAS-F-61200              | MH399868        |                 |                 |                 |
|                                                  | GC 1609-42                | MF540767        |                 |                 |                 |
|                                                  | GEL 3466                  | MH880233        |                 |                 |                 |
|                                                  | ICMP 13837                | AF145587        |                 |                 |                 |
|                                                  | LWZ 20150731-11<br>(IFP)  | <b>MT319566</b> | <b>MT319309</b> | <b>MT326484</b> |                 |
|                                                  | LWZ 20171014-9<br>(IFP)*  | <b>MT319569</b> | <b>MT319311</b> | <b>MT326485</b> |                 |
|                                                  | LWZ 20180415-1<br>(HMAS)  | <b>MT319568</b> |                 |                 |                 |
|                                                  | Wu 0809-76                | KX857803        | KX857815        |                 |                 |

|                             |                           |                 |                 |                 |
|-----------------------------|---------------------------|-----------------|-----------------|-----------------|
|                             | Wu 0606-140               | MF540768        |                 |                 |
|                             | Yuan 4399 (IFP)           | <b>MT319570</b> |                 |                 |
| <i>X. subserpentiformis</i> | LWZ 20180509-2<br>(HMAS)* | <b>MT319481</b> | <b>MT319223</b> | <b>MT326452</b> |
|                             | LWZ 20180512-16<br>(HMAS) | <b>MT319486</b> | <b>MT319226</b> | <b>MT326453</b> |
|                             | LWZ 20180513-28<br>(HMAS) | <b>MT319480</b> | <b>MT319222</b> |                 |
|                             | LWZ 20180515-15<br>(HMAS) | <b>MT319482</b> |                 |                 |
|                             | LWZ 20180515-16<br>(HMAS) | <b>MT319483</b> | <b>MT319224</b> |                 |
|                             | LWZ 20180515-19<br>(HMAS) | <b>MT319484</b> | <b>MT319225</b> |                 |
|                             | LWZ 20180515-22<br>(HMAS) | <b>MT319479</b> | <b>MT319221</b> |                 |
| <i>X. subtropicus</i>       | LWZ 20180509-1<br>(HMAS)  | <b>MT319526</b> | <b>MT319293</b> |                 |
|                             | LWZ 20180509-3<br>(HMAS)  | <b>MT319532</b> | <b>MT319299</b> |                 |
|                             | LWZ 20180509-6<br>(HMAS)* | <b>MT319537</b> | <b>MT319305</b> | <b>MT326520</b> |
|                             | LWZ 20180509-16<br>(HMAS) | <b>MT319535</b> | <b>MT319303</b> |                 |
|                             | LWZ 20180509-18<br>(HMAS) | <b>MT319536</b> | <b>MT319302</b> | <b>MT326481</b> |

|                           |                 |                 |                 |                 |
|---------------------------|-----------------|-----------------|-----------------|-----------------|
| LWZ 20180509-21<br>(HMAS) | <b>MT319530</b> | <b>MT319297</b> | <b>MT326478</b> |                 |
| LWZ 20180509-22<br>(HMAS) | <b>MT319531</b> | <b>MT319298</b> | <b>MT326479</b> |                 |
| LWZ 20180510-3<br>(HMAS)  | <b>MT319538</b> | <b>MT319304</b> | <b>MT326482</b> | <b>MT326279</b> |
| LWZ 20180510-15<br>(HMAS) | <b>MT319527</b> | <b>MT319294</b> | <b>MT326476</b> |                 |
| LWZ 20180510-24<br>(HMAS) | <b>MT319541</b> | <b>MT319308</b> |                 |                 |
| LWZ 20180512-15<br>(HMAS) | <b>MT319539</b> | <b>MT319306</b> | <b>MT326521</b> |                 |
| LWZ 20180513-12<br>(HMAS) | <b>MT319534</b> | <b>MT319301</b> | <b>MT326480</b> |                 |
| LWZ 20180514-3<br>(HMAS)  | <b>MT319525</b> |                 |                 |                 |
| LWZ 20180514-8<br>(HMAS)  | <b>MT319529</b> | <b>MT319296</b> | <b>MT326477</b> |                 |
| LWZ 20180514-15<br>(HMAS) | <b>MT319533</b> | <b>MT319300</b> |                 |                 |
| LWZ 20180514-21<br>(HMAS) | <b>MT319540</b> | <b>MT319307</b> | <b>MT326483</b> |                 |
| LWZ 20180515-12<br>(HMAS) | <b>MT319528</b> | <b>MT319295</b> |                 |                 |
| NZFS 4546                 | MH409968        |                 |                 |                 |
| P. CH-4                   | KF562013        |                 |                 |                 |

|                            |                |          |          |          |          |
|----------------------------|----------------|----------|----------|----------|----------|
|                            | UC2022947      | KP814552 |          |          |          |
|                            | Wu 1508-2      | KX857806 | KX857812 |          |          |
|                            | Wu 9806-105    | KX857807 | KX857809 |          |          |
| = <i>X. laurentianus</i>   | DLL 2009-049   | JQ673187 | KY962866 | KY967075 |          |
|                            | HHB 719        | KY962845 | KY962865 | KY967076 |          |
| = <i>X. novozelandicus</i> | ICMP 13829     | AF145577 | KY962850 | KY967071 | KY967067 |
|                            | ICMP 13833     | AF145580 | KY962853 | KY967073 | KY967068 |
|                            | ICMP 13838     | AF145578 | KY962851 | KY967069 |          |
|                            | ICMP 13840     | AF145576 | KY962849 | KY967070 | KY967066 |
|                            | ICMP 13841     | AF145579 | KY962852 | KY967072 | KY967065 |
|                            | PDD 91616      | GQ411525 |          |          |          |
| = <i>X. patagonicus</i>    | ICMP 13832     | AF145581 | KY962848 | KY967074 | KY967058 |
|                            | MA-Fungi 90702 | KY962836 | KY962854 |          | KY967062 |
|                            | MA-Fungi 90704 | KY962840 |          |          | KY967060 |
|                            | MA-Fungi 90705 | KY962835 |          |          | KY967063 |
|                            | MA-Fungi 90706 | KY962838 | KY962856 |          | KY967064 |
|                            | MA-Fungi 90707 | KY962837 | KY962855 |          | KY967061 |
|                            | MA-Fungi 90708 | KY962839 | KY962857 |          | KY967059 |
| = <i>X. raduloides</i>     | Dai 12631      | KT203307 |          |          |          |
|                            | JR 02          | MH880221 |          |          |          |
|                            | JR 03          | MH880222 |          |          |          |
|                            | JR 09          | MH880223 |          |          |          |
|                            | JR 10          | MH880224 |          |          |          |
|                            | JR 26          | MH880225 | MH884910 |          |          |
|                            | LR 18813       | MH880226 | MH884911 |          |          |
|                            | MA-Fungi 22499 | KY962822 | KY962861 |          |          |

|                        |                           |                 |                 |                 |                 |
|------------------------|---------------------------|-----------------|-----------------|-----------------|-----------------|
|                        | MA-Fungi 22513            | KY962823        | KY962862        |                 |                 |
|                        | MA-Fungi 35643            | KY962831        | KY962858        |                 | KY967054        |
|                        | MA-Fungi 75130            | KY962824        | KY962863        | KY967079        | KY967057        |
|                        | MA-Fungi 75272            | KY962829        | KY962859        | KY967077        | KY967053        |
|                        | MA-Fungi 75310            | KY962825        | KY962864        | KY967080        | KY967055        |
|                        | MA-Fungi 90709            | KY962844        | KY962860        | KY967078        | KY967056        |
| <i>X. ussuriensis</i>  | KUN 1989                  | MH324468        |                 |                 |                 |
| <i>X. verecundus</i>   | KHL 12261                 | DQ873642        |                 |                 |                 |
| <i>X. victoriensis</i> | LWZ 20180510-29<br>(HMAS) | <b>MT319487</b> | <b>MT319228</b> |                 |                 |
|                        | LWZ 20180512-11<br>(HMAS) | <b>MT319485</b> | <b>MT319227</b> |                 |                 |
| <i>X. yarraensis</i>   | LWZ 20180509-7<br>(HMAS)  | <b>MT319640</b> | <b>MT319371</b> |                 |                 |
|                        | LWZ 20180510-4<br>(HMAS)* | <b>MT319635</b> | <b>MT319370</b> | <b>MT326500</b> | <b>MT326282</b> |
|                        | LWZ 20180510-5<br>(HMAS)  | <b>MT319639</b> | <b>MT319378</b> | <b>MT326505</b> |                 |
|                        | LWZ 20180510-16<br>(HMAS) | <b>MT319637</b> | <b>MT319373</b> |                 |                 |
|                        | LWZ 20180510-19<br>(HMAS) | <b>MT319638</b> | <b>MT319377</b> |                 |                 |
|                        | LWZ 20180510-25<br>(HMAS) | <b>MT319636</b> | <b>MT319369</b> |                 |                 |
|                        | LWZ 20180512-19<br>(HMAS) | <b>MT319645</b> |                 |                 |                 |



|                       |                             |                 |                 |                 |
|-----------------------|-----------------------------|-----------------|-----------------|-----------------|
|                       | LWZ 20180512-21<br>(HMAS)   | <b>MT319641</b> | <b>MT319372</b> | <b>MT326501</b> |
|                       | LWZ 20180512-22<br>(HMAS)   | <b>MT319642</b> | <b>MT319374</b> | <b>MT326502</b> |
|                       | LWZ 20180512-23<br>(HMAS)   | <b>MT319643</b> | <b>MT319375</b> | <b>MT326503</b> |
|                       | LWZ 20180512-29<br>(HMAS)   | <b>MT319644</b> | <b>MT319376</b> | <b>MT326504</b> |
| <i>X. yunnanensis</i> | Cui 8129 (BJFC)             | <b>MT319506</b> | <b>MT319251</b> |                 |
|                       | LWZ 20180920-12a<br>(HMAS)* | <b>MT319651</b> | <b>MT319252</b> | <b>MT326534</b> |
|                       | LWZ 20180922-47<br>(HMAS)   | <b>MT319660</b> | <b>MT319253</b> | <b>MT326535</b> |
| <i>Xylodon</i> sp.    | Dai 12590 (BJFC)            | <b>MT319508</b> | <b>MT319256</b> |                 |
| <i>Xylodon</i> sp.    | H Berglund 1117             | DQ873633        | DQ873634        |                 |
| <i>Xylodon</i> sp.    | LWZ 20171015-26<br>(IFP)*   | <b>MT319515</b> | <b>MT319260</b> | <b>MT326537</b> |
| <i>Xylodon</i> sp.    | LWZ 20180517-34<br>(HMAS)   | <b>MT319565</b> | <b>MT319285</b> |                 |
| <i>Xylodon</i> sp.    | LWZ 20180518-8<br>(HMAS)    | <b>MT319510</b> | <b>MT319257</b> |                 |
| <i>Xylodon</i> sp.    | LWZ 20180904-28<br>(HMAS)   | <b>MT319674</b> | <b>MT319366</b> |                 |
| <i>Xylodon</i> sp.    | LWZ 20180922-19<br>(HMAS)*  | <b>MT319657</b> | <b>MT319379</b> | <b>MT326557</b> |
| <i>Xylodon</i> sp.    | LWZ 20180922-26             | <b>MT319658</b> | <b>MT319380</b> | <b>MT326558</b> |

|                 |                            |                  |          |                 |                 |
|-----------------|----------------------------|------------------|----------|-----------------|-----------------|
|                 |                            | (HMAS)*          |          |                 |                 |
|                 | ' <i>X. raduloides</i> '   | FCUG 2433        | AF145570 | AJ406466        |                 |
| /Incertae sedis | <i>Atheloderma</i>         | TAA 169235       | DQ873592 | DQ873592        |                 |
|                 | <i>mirabile</i>            |                  |          |                 |                 |
|                 | <i>Basidioradulum</i>      | AFTOL-ID 451     | DQ234537 | AY700184        |                 |
|                 | <i>radula</i>              |                  |          |                 |                 |
|                 | <i>Blasiphalia</i>         | Lutzoni 930728-3 | U66437   | U66437          |                 |
|                 | <i>pseudogrisella</i>      |                  |          |                 |                 |
|                 | <i>Contumyces rosella</i>  | Redhead 7501     | U66452   | U66452          |                 |
|                 | <i>Cotylidia</i> sp.       | AFTOL-ID 700     | AY854079 | AY629317        |                 |
|                 | <i>Fibricium rude</i>      | CBS 339.66       | MH858815 | MH870454        |                 |
|                 | <i>Globulicium hiemale</i> | Hjm 19007        | DQ873595 | DQ873595        |                 |
|                 | <i>Hastodontia</i>         | HHB-17058 (CFMR) | MK575207 | MK598738        |                 |
|                 | <i>halonata</i>            |                  |          |                 |                 |
|                 | <i>H. hastata</i>          | GEL 2143         | DQ340323 |                 |                 |
|                 |                            | GEL 3124         | DQ340311 |                 |                 |
|                 |                            | KHL 14646        | MH638232 | MH638232        |                 |
|                 | <i>Leifia brevispora</i>   | LWZ 20170820-46  | MK343469 | <b>MT319400</b> |                 |
|                 | <i>Leifia</i> sp.          | LWZ 20171015-36  | MK343471 | <b>MT319402</b> | <b>MT326522</b> |
|                 |                            | (IFP)            |          |                 |                 |
|                 | <i>Leifia</i> sp.          | LWZ 20171015-38  | MK343472 | <b>MT319403</b> | <b>MT326569</b> |
|                 |                            | (IFP)            |          |                 |                 |
|                 | <i>Loreleia</i>            | Lutzoni 930826-1 | U66432   | U66432          |                 |
|                 | <i>marchantiae</i>         |                  |          |                 |                 |
|                 | <i>Odonticium romellii</i> | 1514b            | DQ873639 | DQ873639        |                 |
|                 | <i>Peniophorella</i>       | KHL 13164        | DQ873597 | DQ873597        |                 |

|                            |                          |                  |                 |                 |                 |
|----------------------------|--------------------------|------------------|-----------------|-----------------|-----------------|
|                            | <i>praetermissa</i>      |                  |                 |                 |                 |
|                            | <i>Repetobasidium</i>    | KHL 12338        | DQ873647        | DQ873647        |                 |
|                            | <i>conicum</i>           |                  |                 |                 |                 |
|                            | <i>Rickenella fibula</i> | AFTOL-ID 486     | DQ241782        | AY700195        |                 |
|                            | <i>R. mellea</i>         | Lamoure 74       | U66438          | U66438          |                 |
|                            | <i>Sidera lunata</i>     | JS 15063         | DQ873593        | DQ873593        |                 |
|                            | <i>Skvortzovia</i>       | KHL 11738        | DQ873648        | DQ873648        |                 |
|                            | <i>furfuraceum</i>       |                  |                 |                 |                 |
|                            | <i>S. furfurella</i>     | KHL 10180        | DQ873649        | DQ873649        |                 |
|                            | <i>S. georgica</i>       | KHL 12019        | DQ873645        | DQ873645        |                 |
|                            | <i>S. pinicola</i>       | KHL 12224        | DQ873637        | DQ873637        |                 |
|                            | <i>Sphaerobasidium</i>   | KHL 11714        | DQ873652        | DQ873653        |                 |
|                            | <i>minutum</i>           |                  |                 |                 |                 |
|                            | <i>Sphagnomphalia</i>    | Lutzoni 930826-1 | U66441          | U66441          |                 |
|                            | <i>brevibasidiata</i>    |                  |                 |                 |                 |
|                            | <i>Trichaptum</i>        | NH 12842         | AF347104        | AF347104        |                 |
|                            | <i>abietinum</i>         |                  |                 |                 |                 |
|                            | <i>Tubulicrinis</i>      | KHL 12133        | DQ873655        | DQ873655        |                 |
|                            | <i>globisporus</i>       |                  |                 |                 |                 |
|                            | <i>T. hirtellus</i>      | KHL 11717        | DQ873657        | DQ873657        |                 |
|                            | <i>T. inornatus</i>      | KHL 11763        | DQ873659        | DQ873659        |                 |
| <i>Polyporales</i>         | <i>Donkioporiella</i>    | LWZ 20140622-12  | KX258957        | KX258955        |                 |
| <i>/Incertae sedis</i>     | <i>mellea</i>            |                  |                 |                 |                 |
| <i>/Phanerochaetaceae</i>  | <i>Ceriporia</i> sp.     | MEL 2400115      | <b>MT332133</b> | <b>MT319137</b> | <b>MT326417</b> |
|                            | <i>Phanerochaete</i> sp. | MEL 2379809      | <b>MT332134</b> | <b>MT319138</b> | <b>MT326418</b> |
| <i>Thelephorales/Thele</i> | <i>Lenzitopsis daii</i>  | Yuan 2959        | JN169799        | JN169795        |                 |

---

*phoraceae*

---

‘Voucher’<sup>#</sup> means this specimen was used in estimating the divergence times of families within *Hymenochaetales*

‘Voucher’\* means this specimen was used in exploring the evolution of hymenophore morphological characters within *Hymenochaetales*.

‘species name’ means this species name is misapplied for the sequence and the accepted species name for this sequence is the name in its previous line of the table.

= species name means this species name is a synonym of the name in its previous line of the table.

[generic name] means this generic name is uncertain.

Newly generated sequences are in bold.
